# Supplementary material
Source: Springer Nature journal article supplement (https://www.springermedizin.de/resource/supplementary/12958_2012_984_MOESM3_ESM.pdf/9566564)

### Estradiol Level $\geq 40y$

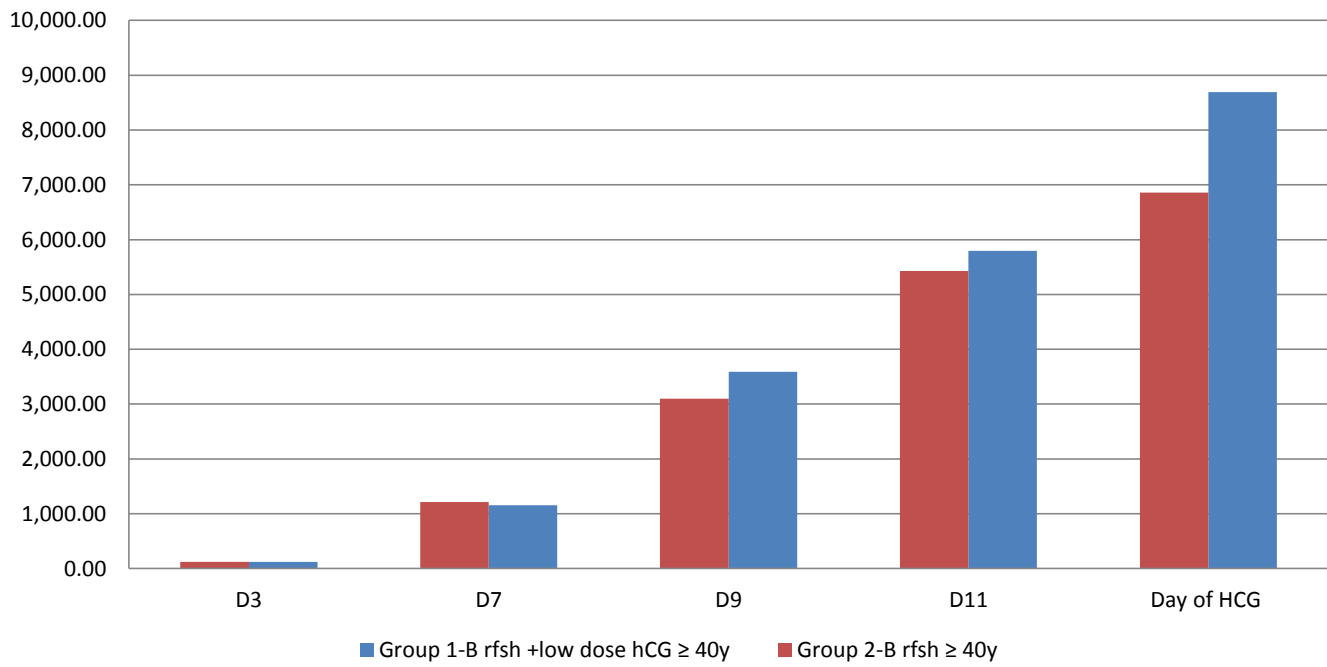

Supplement: MOESM3 [file 9566564]
